# Supplementary material
Source: MDPI journal article supplement (https://www.mdpi.com/2079-9292/12/3/540)
Supplement: s1 [file s1 › electronics-2140554-supplementary.pdf]

# Observation of large threshold voltage shift induced by pre-applied voltage to SiO<sub>2</sub> gate dielectric in organic field-effect transistors

Yifu Guo<sup>1</sup>, Junyang Deng<sup>2,3</sup>, Jiebin Niu<sup>2</sup>, Chunhui Duan<sup>4</sup>, Shibing Long<sup>1</sup>, Mengmeng Li<sup>\*,2,3</sup> and Ling Li<sup>2</sup>

<sup>1</sup> School of Microelectronics, University of Science and Technology of China, Hefei, 230026, China

<sup>2</sup> Key Laboratory of Microelectronic Devices and Integrated Technology, Institute of Microelectronics, Chinese Academy of Sciences, Beijing 100029, China

<sup>3</sup> University of Chinese Academy of Sciences, Beijing 100049, China

<sup>4</sup> Institute of Polymer Optoelectronic Materials & Devices, State Key Laboratory of Luminescent Materials and Devices, South China University of Technology, Guangzhou 510640, China

\* Correspondence: limengmeng@ime.ac.cn; Tel.: +86-10-82995580

**(a)**

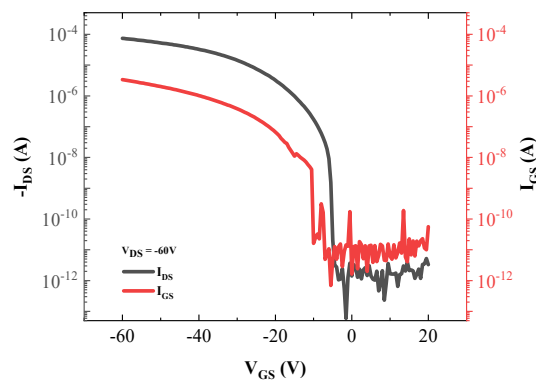

**(b)**

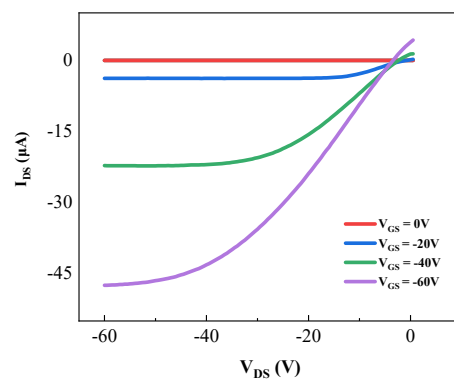

**Figure S1.** The transfer (a) and output (b) curves of PffBT4T-2DT transistor.

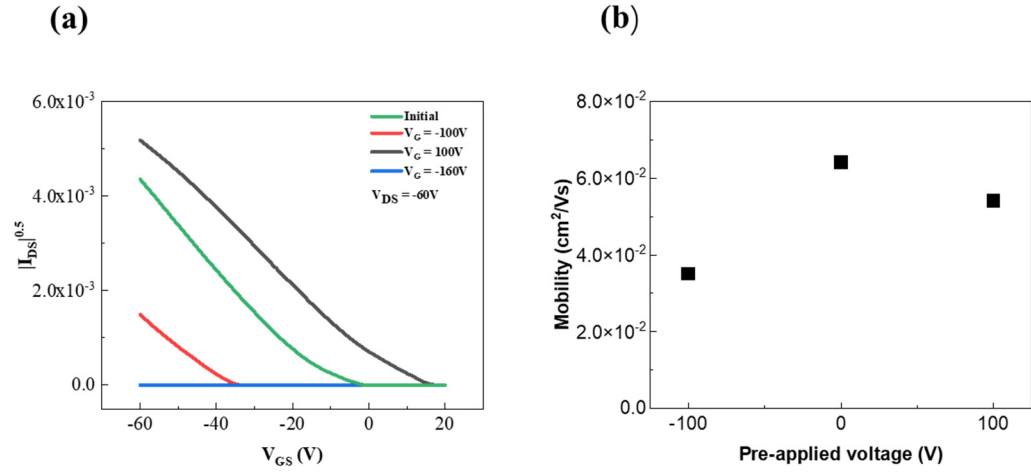

**Figure S2.** (a)  $I_{DS}^{0.5}$  vs  $V_{GS}$  plotting, where the data are from Figure 2 (a); (b) Saturation mobility at different pre-applied voltages.

**(a)**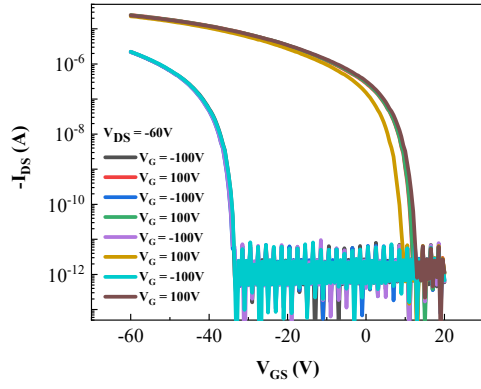**(b)**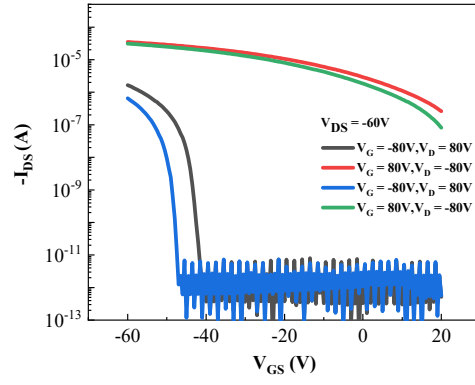

**Figure S3.** (a) PffBT4T-2DT transistor transfer curves of -100 V and 100 V pre-applied voltage at the gate electrode for multiple times; (b) The transfer curves obtained by repeatedly pre-applied different voltages to the gate and drain electrodes simultaneously.

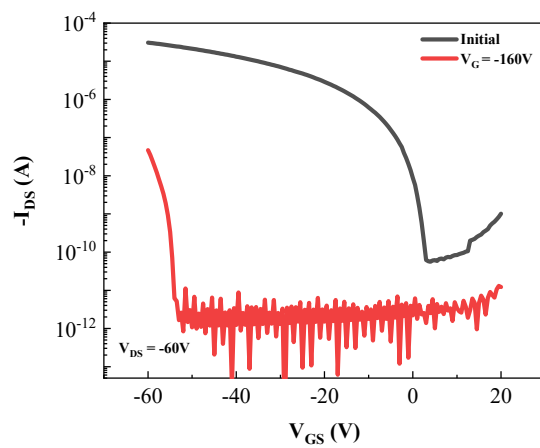

**Figure S4.** Transfer curves of PffBT4T-2DT transistor without PFBT modification at different pre-applied voltages to the gate electrode.

**(a)**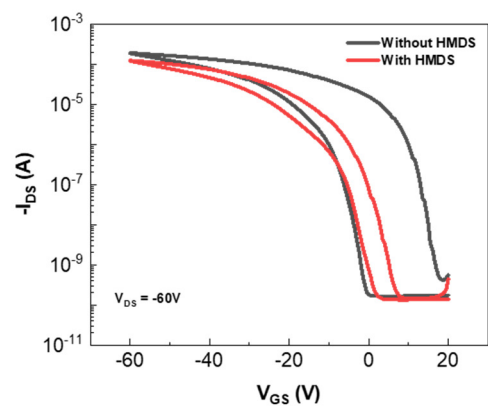**(b)**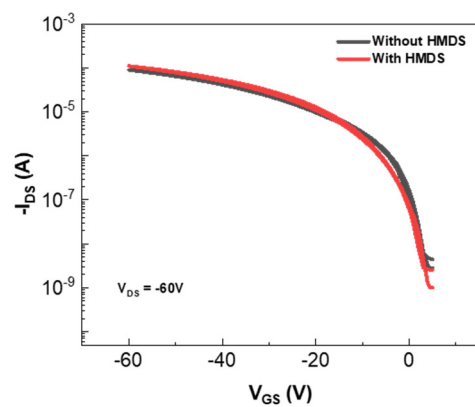

**Figure S5.** Hysteresis behaviors of PffBT4T-2DT (a) and PDPP3T (b) transistors before and after HMDS modification.

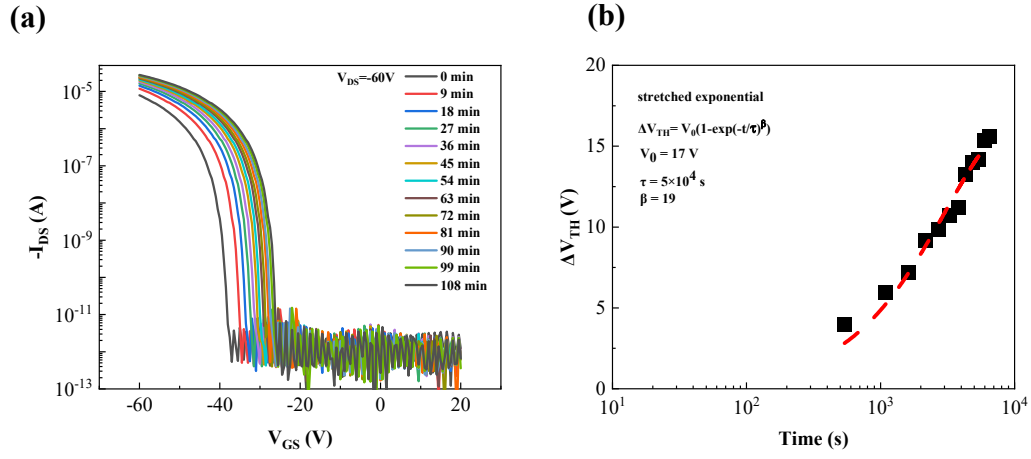

**Figure S6.** (a) Pre-applied a -140 V gate voltage, the relationship of HMDS treated device transfer curve with time; (b) Fitting the threshold voltage over time after a pre-applied -140 voltage by stretched exponential model.

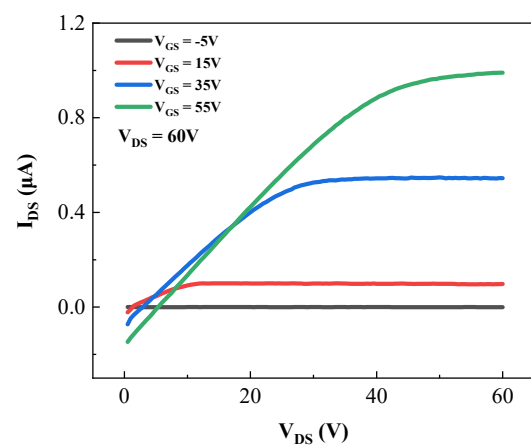

**Figure S7.** Output curves of PTzNDI-2FT transistor.
